# Supplementary material
Source: HighWire-hosted journal article supplement (doi:10.1101/rna.079071.121)
Supplement: SuppFigS1.pdf [file SuppFigS1.pdf]

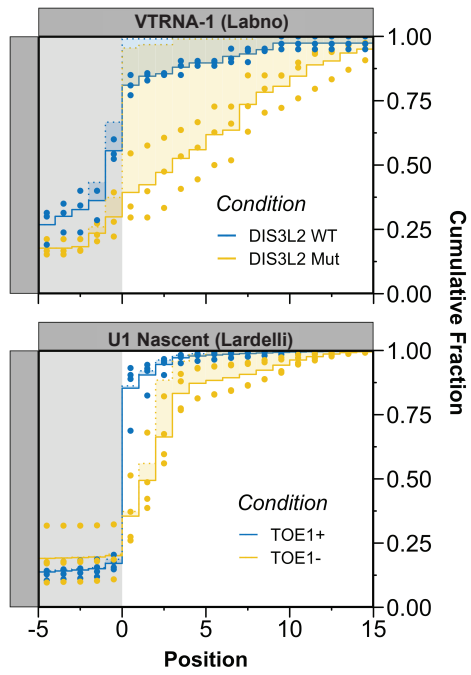

**Supplementary Figure S1. Recreation of cumulative plots from Figure 4D with optional replicate dots.** Replicate dots can be toggled on and off using the options panel.
