# Supplementary material
Source: HighWire-hosted journal article supplement (doi:10.1101/rna.079071.121)
Supplement: SuppFigS2.pdf [file SuppFigS2.pdf]

## VTRNA1-1 (Labno)

### End Position KS-test Matrix

|              | DIS3L2 WT_1  | DIS3L2 WT_2  | DIS3L2 WT_3  |
|--------------|--------------|--------------|--------------|
| DIS3L2 Mut_1 | 4.829023E-05 | 4.339632E-04 | 2.187131E-01 |
| DIS3L2 Mut_2 | 7.084303E-04 | 1.295540E-03 | 3.120647E-01 |
| DIS3L2 Mut_3 | 9.286356E-06 | 1.645482E-04 | 2.532410E-01 |

### Pooled End Position KS-test

1.852351e-09

### Tail Length KS-test Matrix

|              | DIS3L2 WT_1  | DIS3L2 WT_2  | DIS3L2 WT_3  |
|--------------|--------------|--------------|--------------|
| DIS3L2 Mut_1 | 2.377555E-05 | 7.524774E-05 | 2.187131E-01 |
| DIS3L2 Mut_2 | 1.222320E-03 | 2.284022E-03 | 6.107870E-01 |
| DIS3L2 Mut_3 | 5.426585E-06 | 4.051894E-05 | 1.465849E-01 |

### Pooled Tail Length KS-test

1.34335e-09

### Number of Observations

| Condition    | n   |
|--------------|-----|
| DIS3L2 WT_1  | 21  |
| DIS3L2 WT_2  | 20  |
| DIS3L2 WT_3  | 35  |
| DIS3L2 Mut_1 | 54  |
| DIS3L2 Mut_2 | 118 |
| DIS3L2 Mut_3 | 33  |

## RNU1-1 (Lardelli)

### End Position KS-test Matrix

|         | TOE1+_1 | TOE1+_2 | TOE1+_3              | TOE1+_4 |
|---------|---------|---------|----------------------|---------|
| TOE1-_1 | <1e-50  | <1e-50  | <1e-50               | <1e-50  |
| TOE1-_2 | <1e-50  | <1e-50  | <1e-50               | <1e-50  |
| TOE1-_3 | <1e-50  | <1e-50  | 2.81840850657744e-09 | <1e-50  |
| TOE1-_4 | <1e-50  | <1e-50  | <1e-50               | <1e-50  |

### Pooled End Position KS-test

<1e-50

### Tail Length KS-test Matrix

|         | TOE1+_1 | TOE1+_2 | TOE1+_3              | TOE1+_4              |
|---------|---------|---------|----------------------|----------------------|
| TOE1-_1 | <1e-50  | <1e-50  | 3.30846461338297e-14 | 8.8159308742064e-09  |
| TOE1-_2 | <1e-50  | <1e-50  | 9.64485158405637e-11 | 4.19450031485802e-07 |
| TOE1-_3 | <1e-50  | <1e-50  | 0.000124527617351933 | 0.000211237539438636 |
| TOE1-_4 | <1e-50  | <1e-50  | 6.50890452646991e-12 | 2.96518487430397e-07 |

### Pooled Tail Length KS-test

<1e-50

### Number of Observations

| Condition | n    |
|-----------|------|
| TOE1+_1   | 3495 |
| TOE1+_2   | 4576 |
| TOE1+_3   | 2567 |
| TOE1+_4   | 8044 |
| TOE1-_1   | 1704 |
| TOE1-_2   | 1355 |
| TOE1-_3   | 1644 |
| TOE1-_4   | 1285 |

**Supplementary Figure S2. Example output from the Tailer-Analysis' statistics tab.** After selecting a gene of interest, each replicate in a condition is compared pairwise to every other replicate in the comparison condition using a KS test. Comparisons are performed for the End Position metric and the Tail Length metric described above. Statistics are also performed after pooling all samples to get a singular pooled KS test metric. The number of observations in each condition is also reported in a table.
